# Supplementary material
Source: Springer Nature journal article supplement (https://www.springermedizin.de/resource/supplementary/13075_2011_3136_MOESM1_ESM.pdf/9693870)

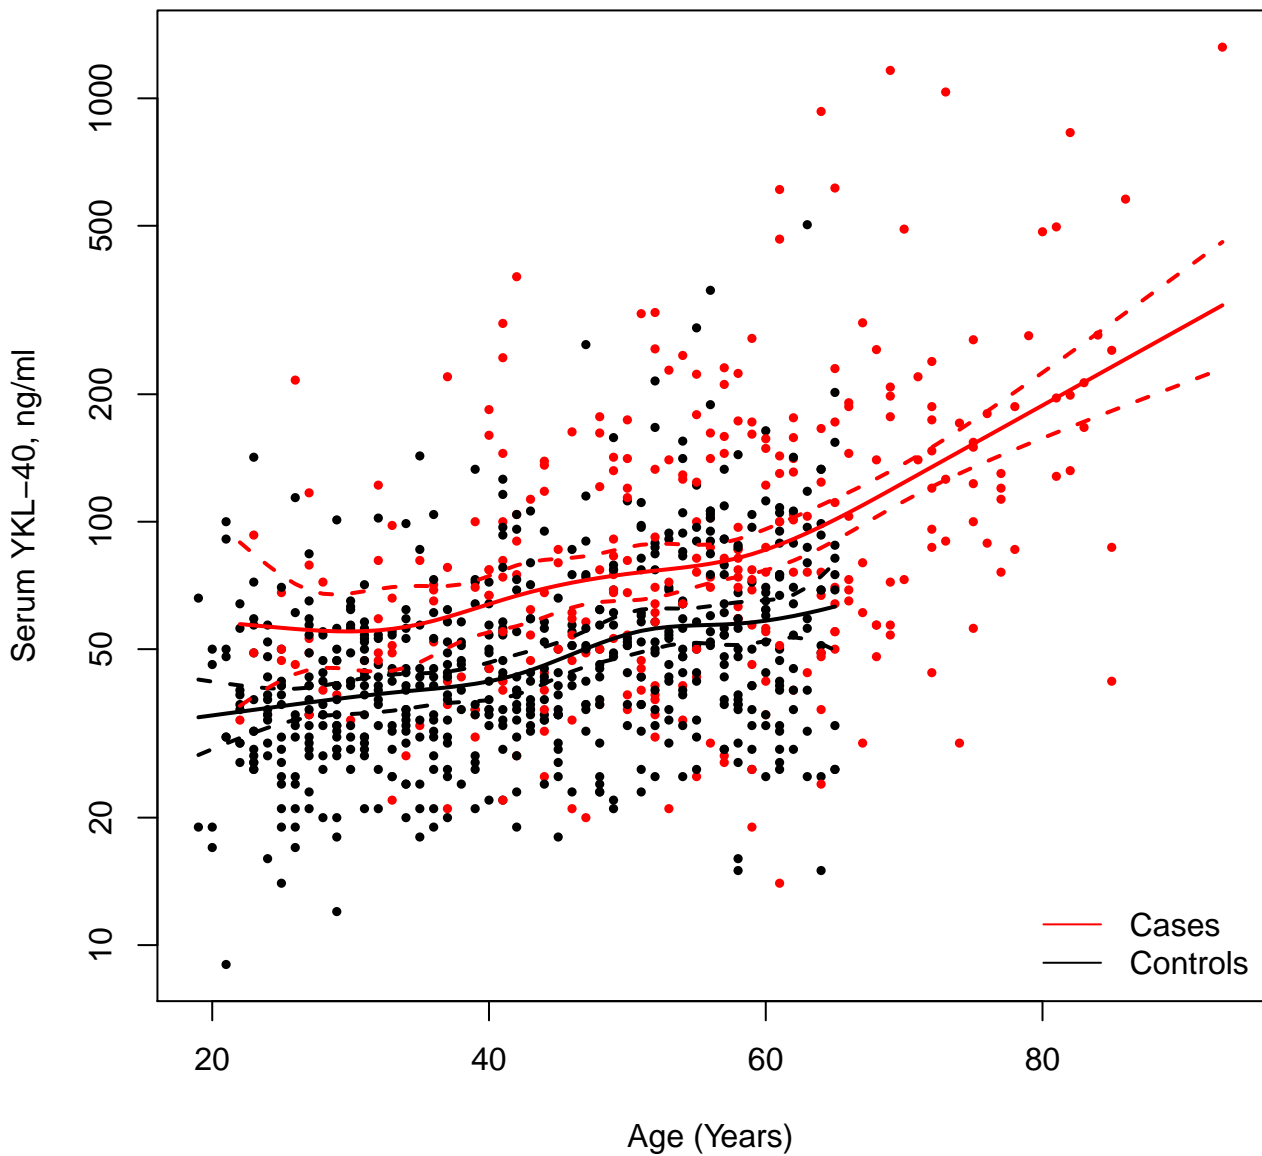

Supplement: MOESM1 [file 9693870]
